# Supplementary material for: Conserved modes of recruitment of ATM, ATR and DNA-PKcs to sites of DNA damage
Source: Springer Nature journal article supplement (doi:10.1038/nature03442), 2005-03-01
Supplement: 41586_2005_BFnature03442_MOESM1_ESM.pdf [file 41586_2005_BFnature03442_MOESM1_ESM.pdf]

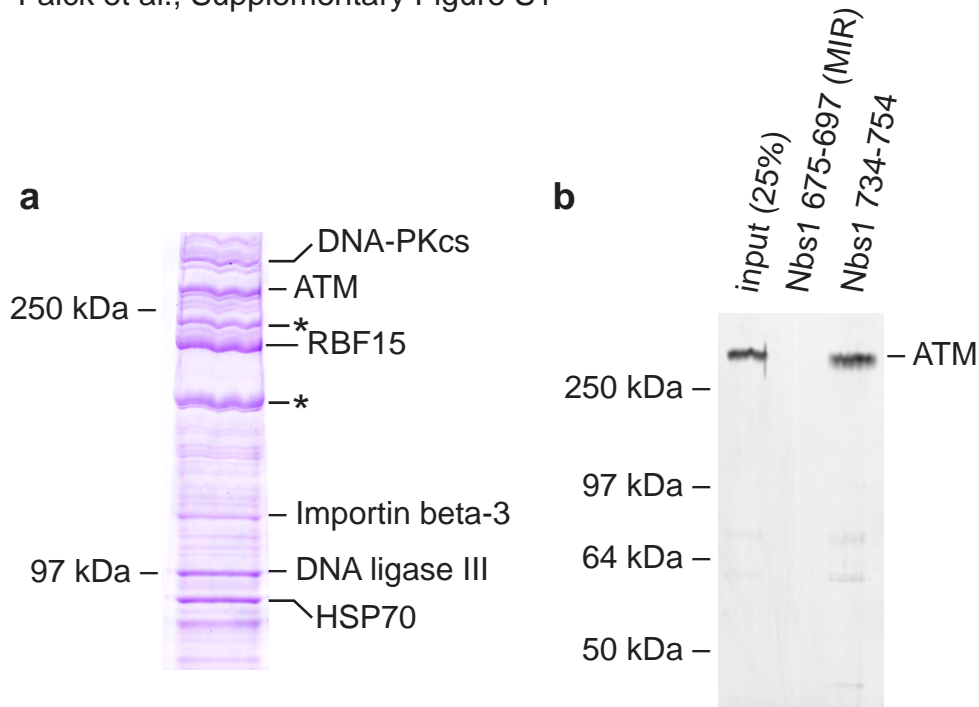

**Supplementary Figure S1.** ATM associates with the Nbs1 C-terminus. **a**, HeLa nuclear extract (5 mg) was incubated with Streptavidin-coated Dynabeads coupled to a biotinylated peptide corresponding to residues 734-754 of human Nbs1 for one hour, washed five times in TBS-T, subject to SDS-PAGE and coomassie stained. The stained gel was submitted for mass spectrometry analysis at the Proteomics Centre at Duke University, Durham, NC, USA. Proteins unambiguously identified are indicated. Some bands were unidentifiable (asterisk) due to complex peptide patterns. **b**, Biotinylated peptides corresponding to the indicated regions of human Nbs1 were incubated with highly purified, recombinant ATM (kind gift from R. Gatti<sup>1</sup>), isolated, subject to SDS-PAGE and silver stained.

1. Chun, H. H., Cary, R. B., Lansigan, F., Whitelegge, J., Rawlings, D. J. & Gatti, R. A. ATM protein purified from vaccinia virus expression system: DNA binding requirements for kinase activation. *Biochem Biophys Res Commun* **322**, 74-81 (2004).
