# Supplementary material for: Conserved modes of recruitment of ATM, ATR and DNA-PKcs to sites of DNA damage
Source: Springer Nature journal article supplement (doi:10.1038/nature03442), 2005-03-01
Supplement: 41586_2005_BFnature03442_MOESM2_ESM.pdf [file 41586_2005_BFnature03442_MOESM2_ESM.pdf]

Falck et al., Supplementary Figure S2

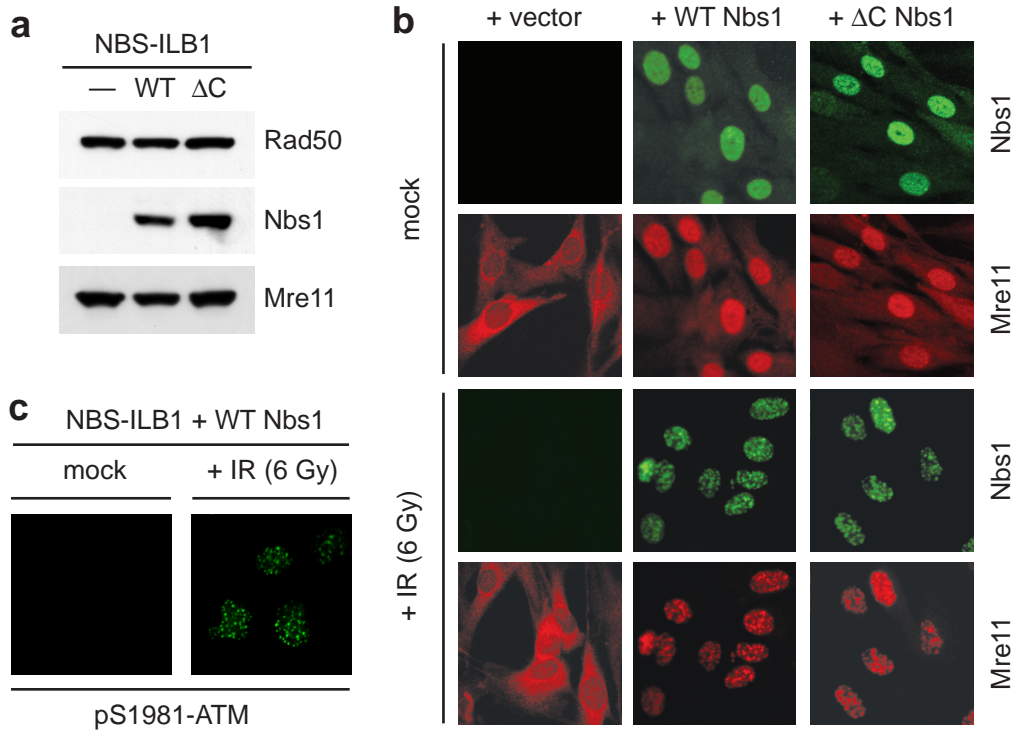

**Supplementary Figure S2.** ATM interaction is not required for IR-induced focus formation by MRN. **a**, Extracts from vector- (-), wild-type (WT), and  $\Delta$ C-complemented NBS-ILB1 cells were immunoblotted as indicated. **b**, Vector-, WT and  $\Delta$ C-complemented NBS-ILB1 cells were either mock treated or irradiated with 6 Gy of IR. One hour post-treatment, cells were fixed and immunostained with antibodies to Nbs1 (green) and Mre11 (red). **c**, WT-complemented NBS-ILB1 cells were either mock treated or irradiated with 6 Gy of IR. One hour post-treatment, cells were fixed and immunostained with an anti-pS1981-ATM antibody.
