# Supplementary material for: Conserved modes of recruitment of ATM, ATR and DNA-PKcs to sites of DNA damage
Source: Springer Nature journal article supplement (doi:10.1038/nature03442), 2005-03-01
Supplement: 41586_2005_BFnature03442_MOESM4_ESM.pdf [file 41586_2005_BFnature03442_MOESM4_ESM.pdf]

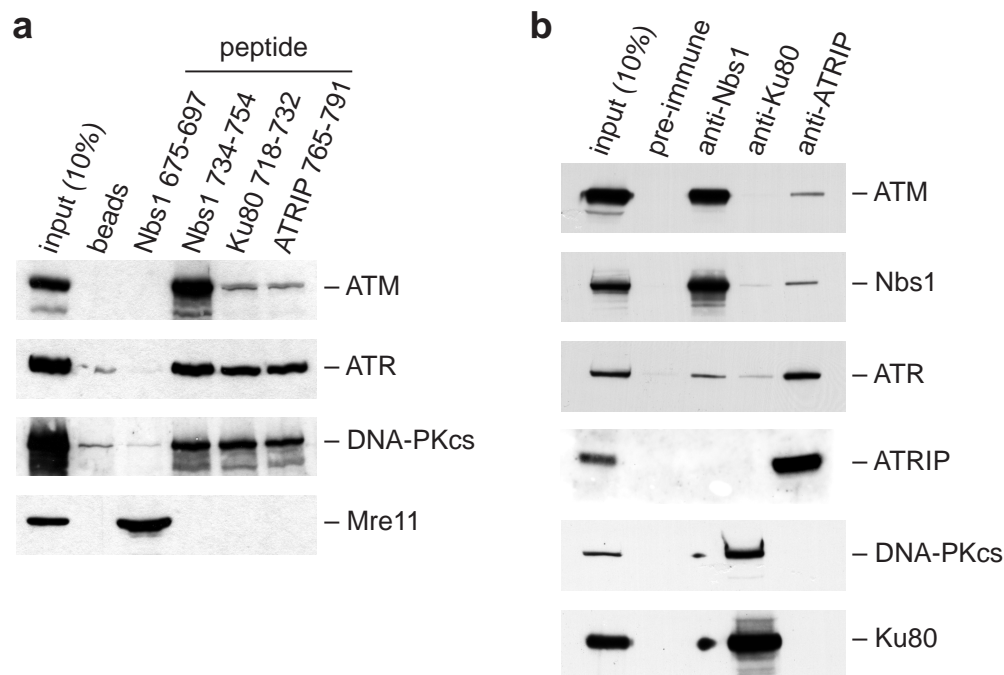

**Supplementary Figure S4.** Specificity of PIKK binding is conferred by multiple interactions. **a**, Biotinylated peptides corresponding to the indicated regions of human Nbs1, Ku80 and ATRIP, or uncoupled beads, were incubated with nuclear extract, and bound proteins isolated and immunoblotted as indicated. **b**, Nuclear extracts were immunoprecipitated in the presence of linear dsDNA and immunoblotted as indicated.
