# Supplementary material for: Conserved modes of recruitment of ATM, ATR and DNA-PKcs to sites of DNA damage
Source: Springer Nature journal article supplement (doi:10.1038/nature03442), 2005-03-01
Supplement: 41586_2005_BFnature03442_MOESM5_ESM.pdf [file 41586_2005_BFnature03442_MOESM5_ESM.pdf]

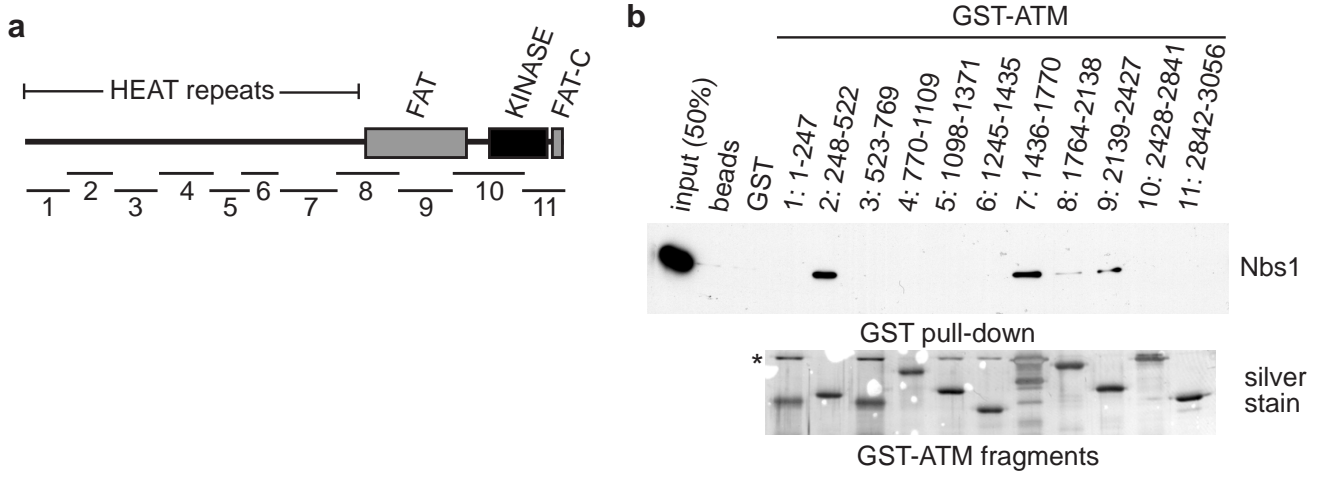

**Supplementary Figure S5.** Nbs1 interacts with regions of ATM containing HEAT repeats. **a, b,** Bacterially expressed GST-ATM fragments (2 g, bottom) were incubated with HeLa nuclear extract (100 g), isolated and immunoblotted for Nbs1 (top). Asterisk indicates a contaminating band found in some GST preparations (bottom).
